# Supplementary material for: Deep Eutectic Solvents as Convenient Media for Synthesis of Novel Coumarinyl Schiff Bases and Their QSAR Studies
Source: MDPI journal article supplement (doi:10.3390/molecules22091482), 2017-09-05

**Supplementary material:  $^1\text{H}$  and  $^{13}\text{C}$  NMR spectra of synthesized compounds**

For manuscript entitled:

# **Deep eutectic solvents as convenient media for synthesis of novel coumarinyl Schiff bases and their QSAR studies**

Maja Molnar <sup>a</sup>, Mario Komar <sup>a</sup>, Harshad Brahmbhatt<sup>a</sup>, Jurislav Babić<sup>a</sup>, Stela Jokić<sup>a</sup>, Vesna Rastija<sup>b,\*</sup>

<sup>a</sup>Josip Juraj Strossmayer University of Osijek, Faculty of Food Technology Osijek, Franje Kuhaca 20, 31000 Osijek, Croatia

<sup>b</sup>Josip Juraj Strossmayer University of Osijek, Faculty of Agriculture in Osijek, Vladimira Preloga 1, 31000 Osijek, Croatia

(E)-N'-(4-methoxybenzylidene)-2-((4-methyl-2-oxo-2H-chromen-7-yl)oxy)acetohydrazide (**10**) [2]

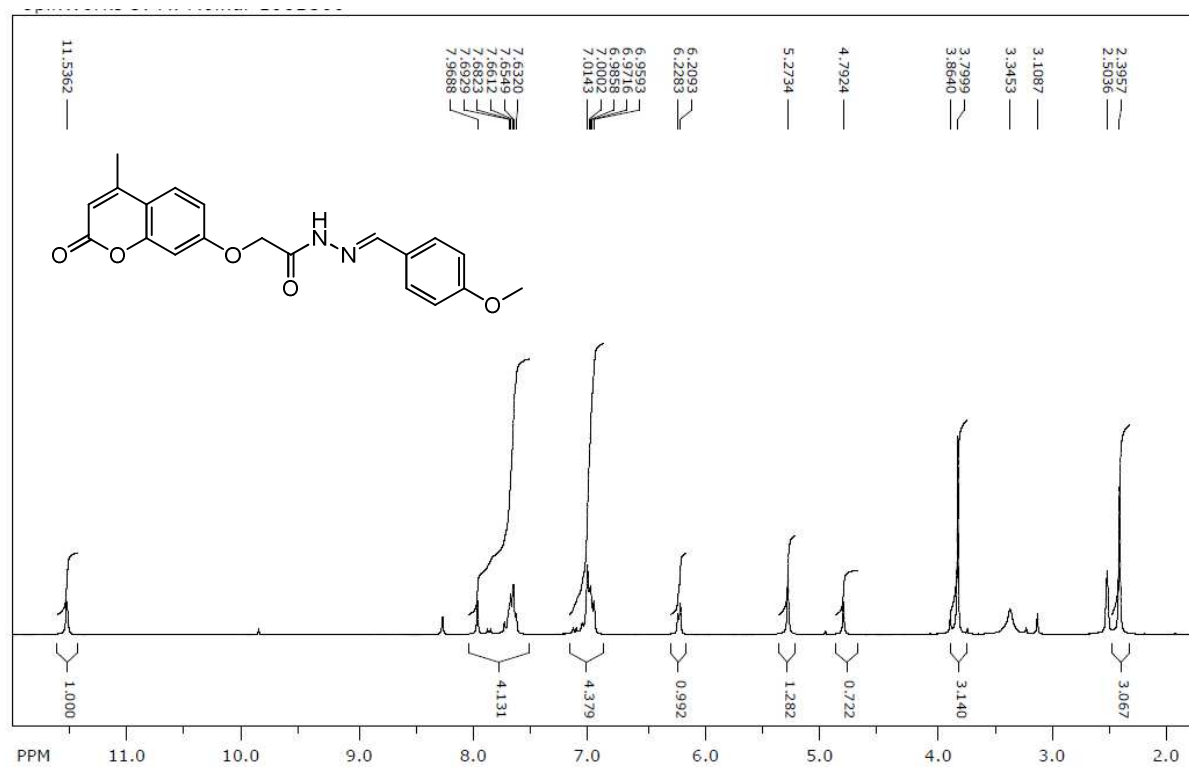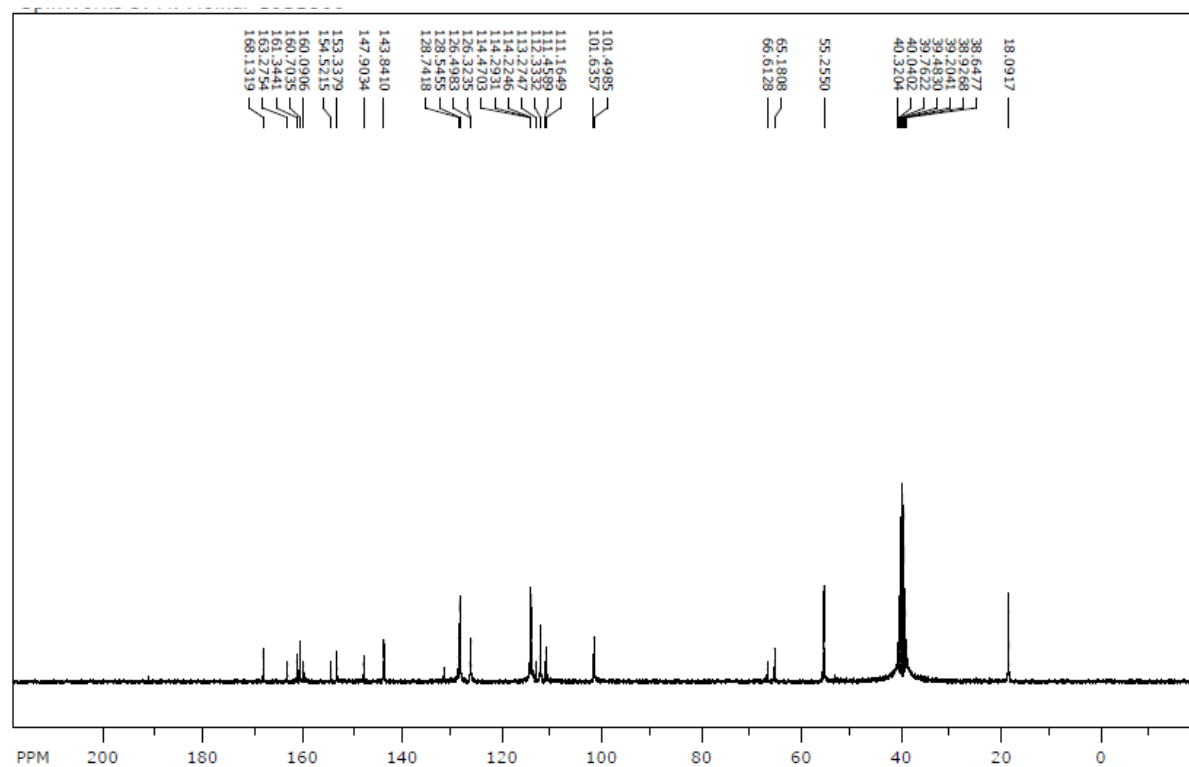

(E)-N'-(4-(dimethylamino)benzylidene)-2-((4-methyl-2-oxo-2H-chromen-7-yl)oxy)acetohydrazide (**29**) [5]

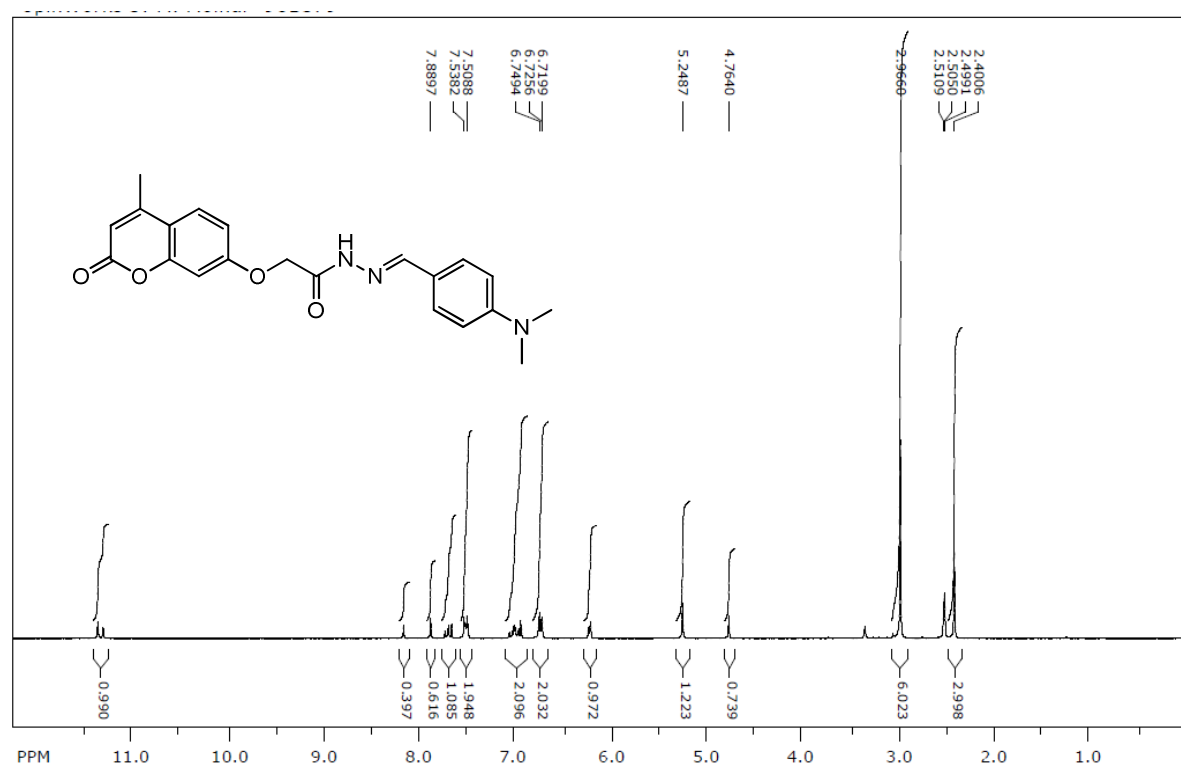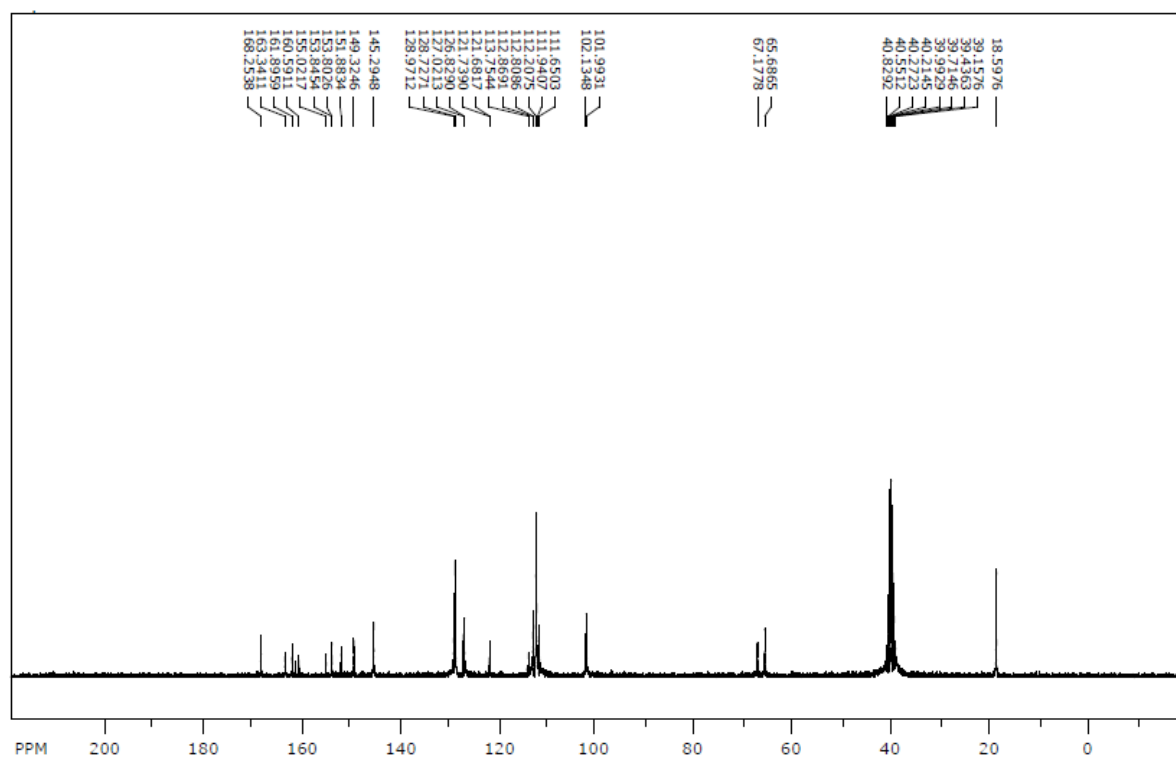

(E)-N'-((3-(4-chlorophenyl)-1-(4-fluorophenyl)-1H-pyrazol-4-yl)methylene)-2-((4-methyl-2-oxo-2H-chromen-7-yl)oxy)acetohydrazide (**30**)

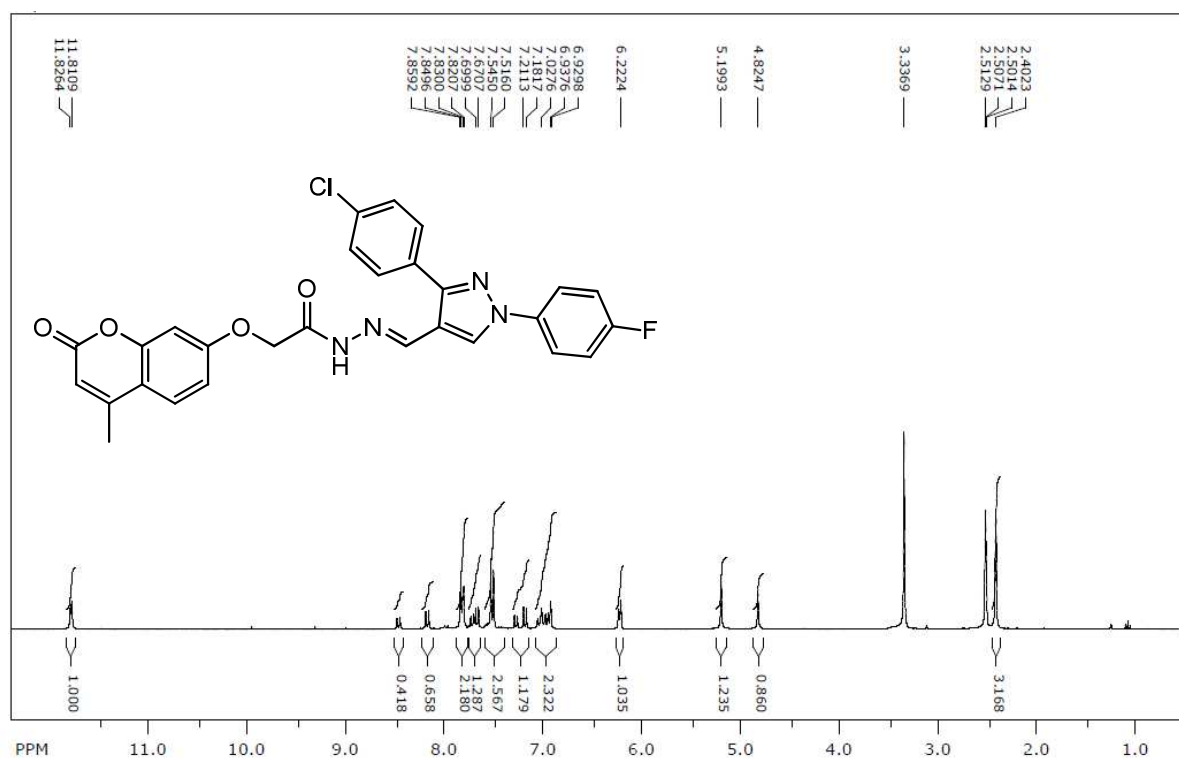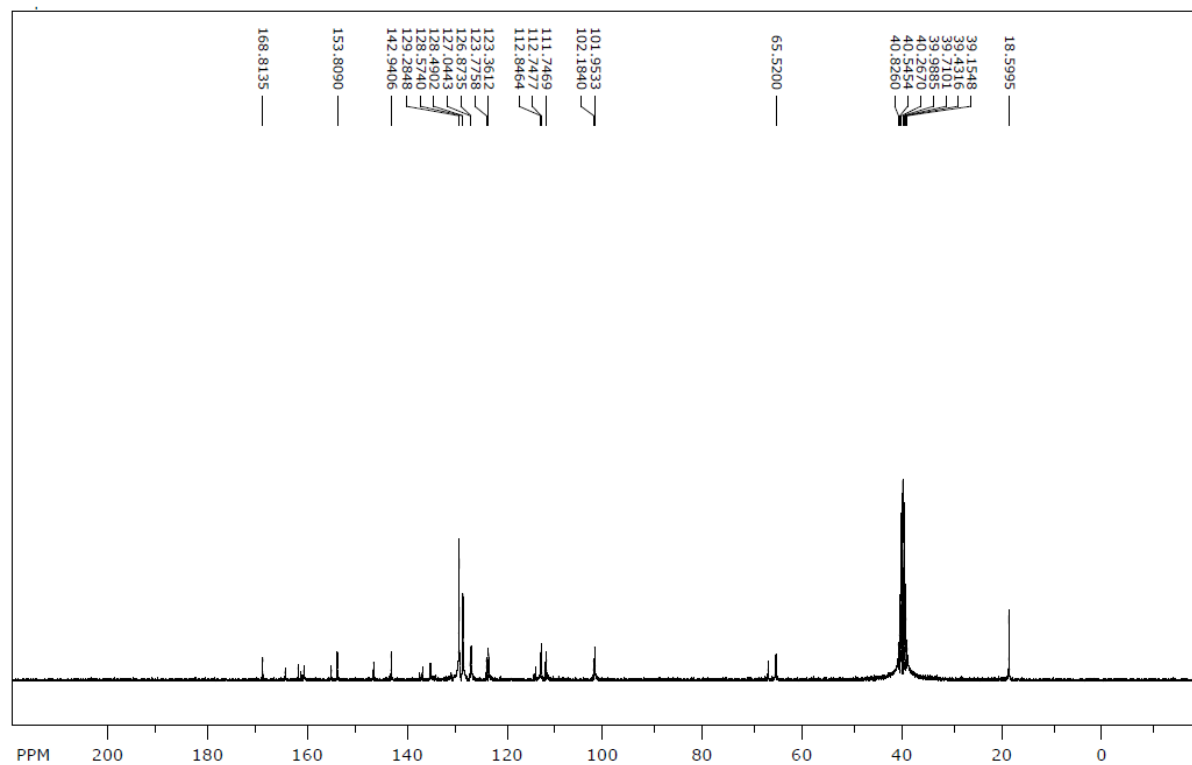

[illegible]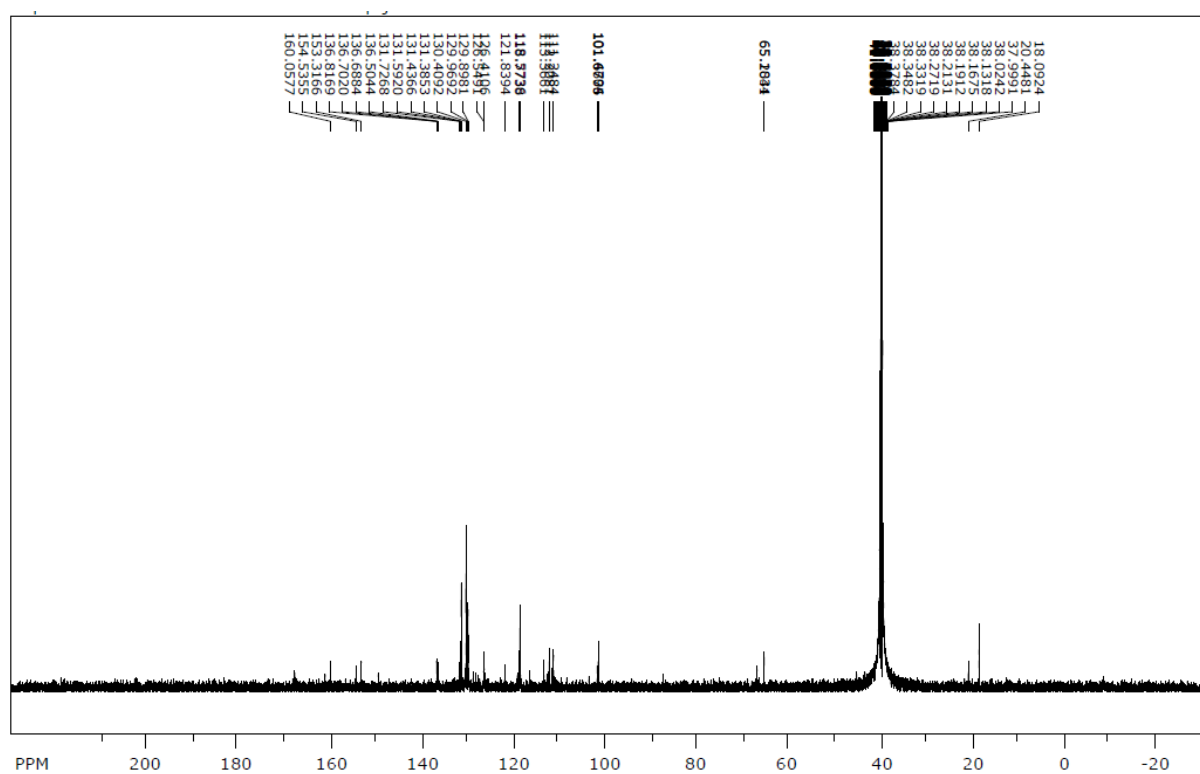

(*E*)-*N'*-((3-(4-iodophenyl)-1-(*p*-tolyl)-1*H*-pyrazol-4-yl)methylene)-2-((4-methyl-2-oxo-2*H*-chromen-7-yl)oxy)acetohydrazide (**32**)

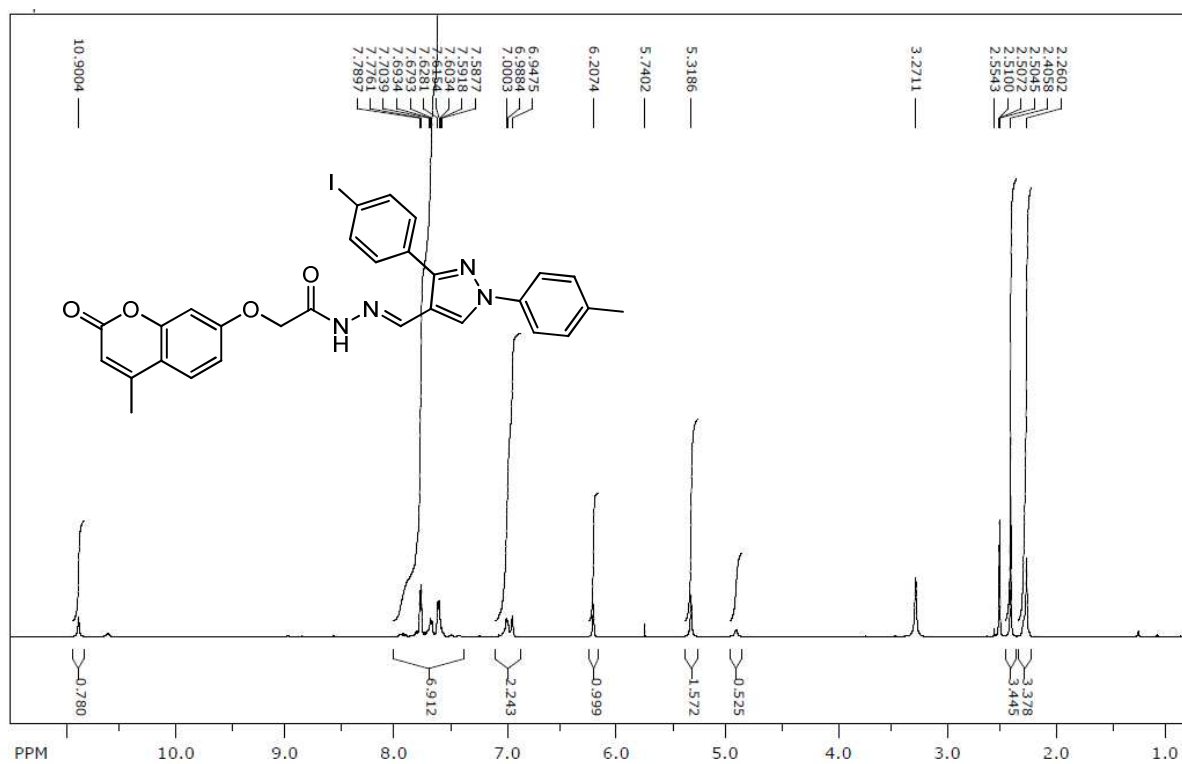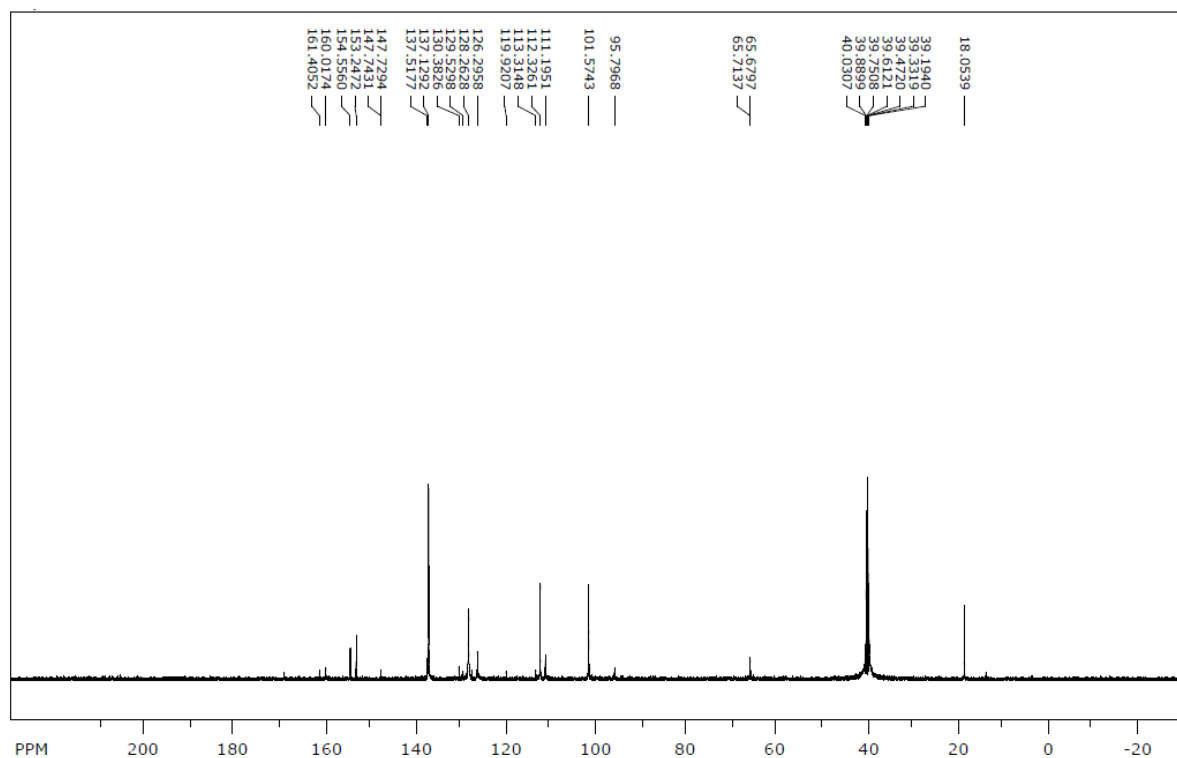

(E)-N'-((3-(4-methoxyphenyl)-1-(p-tolyl)-1H-pyrazol-4-yl)methylene)-2-((4-methyl-2-oxo-2H-chromen-7-yl)oxy)acetohydrazide (**33**)

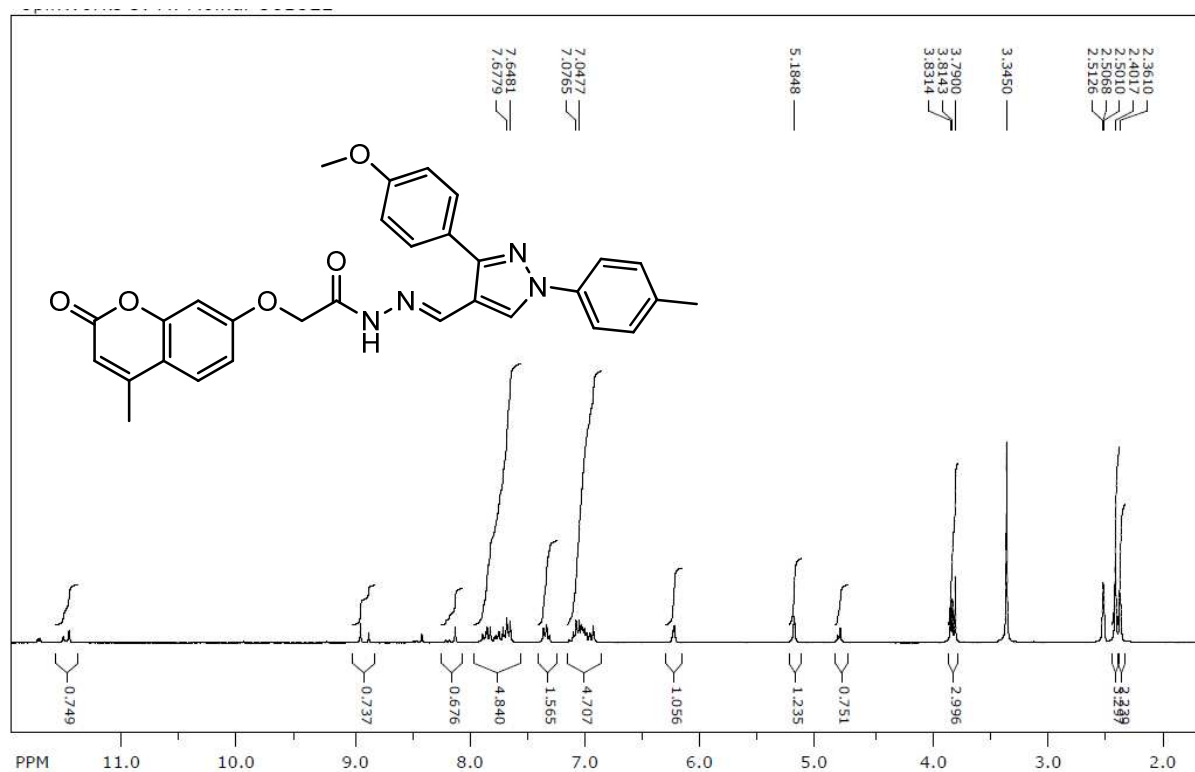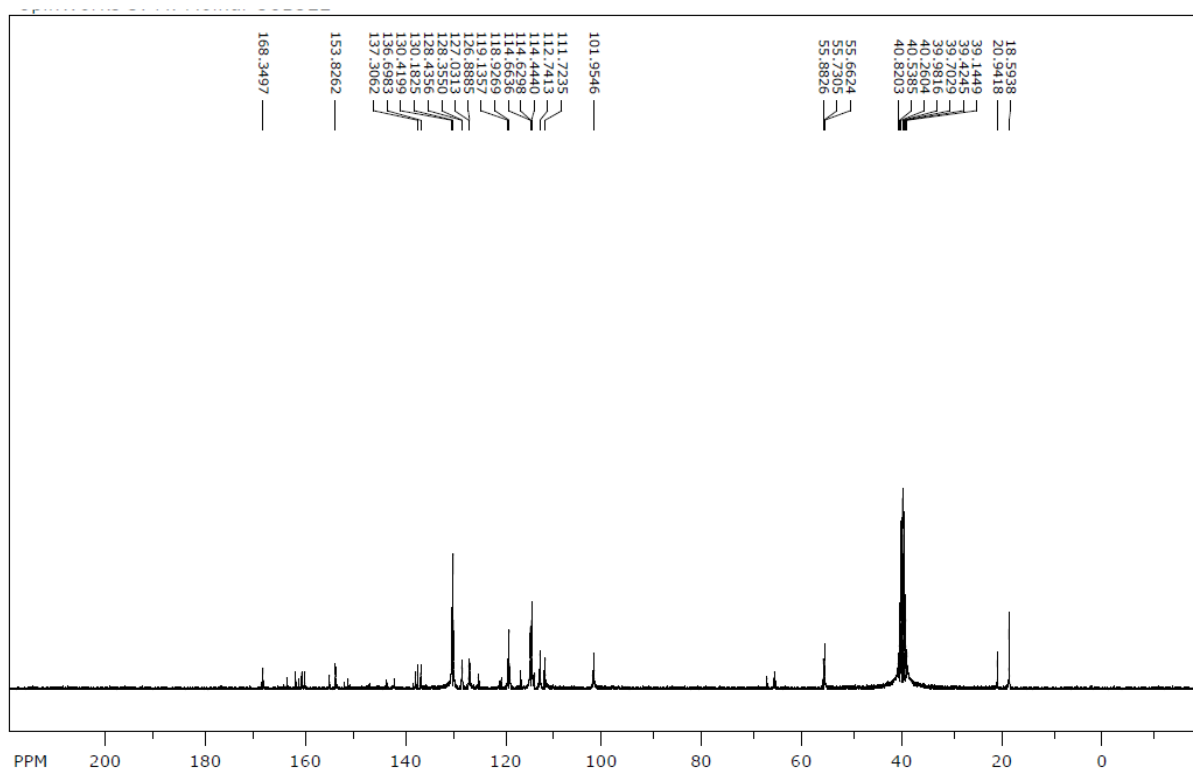

(E)-N'-((3-(4-chlorophenyl)-1-(p-tolyl)-1H-pyrazol-4-yl)methylene)-2-((4-methyl-2-oxo-2H-chromen-7-yl)oxy)acetohydrazide (**34**)

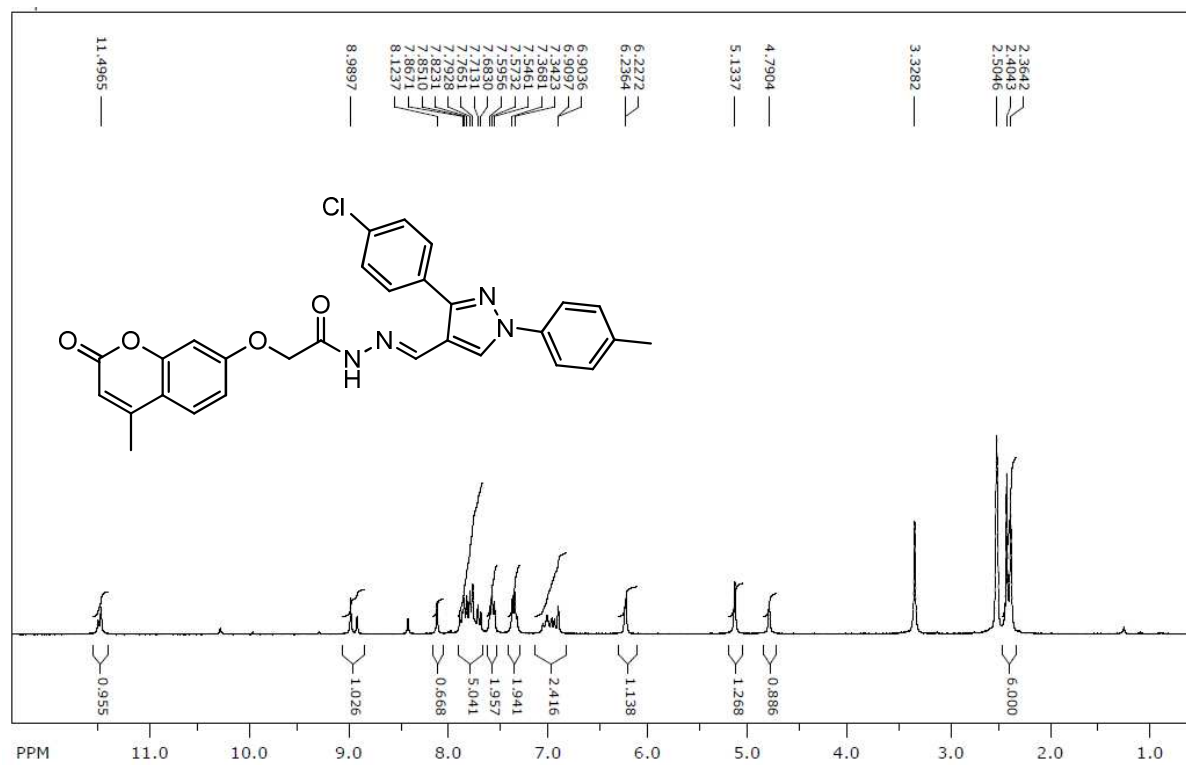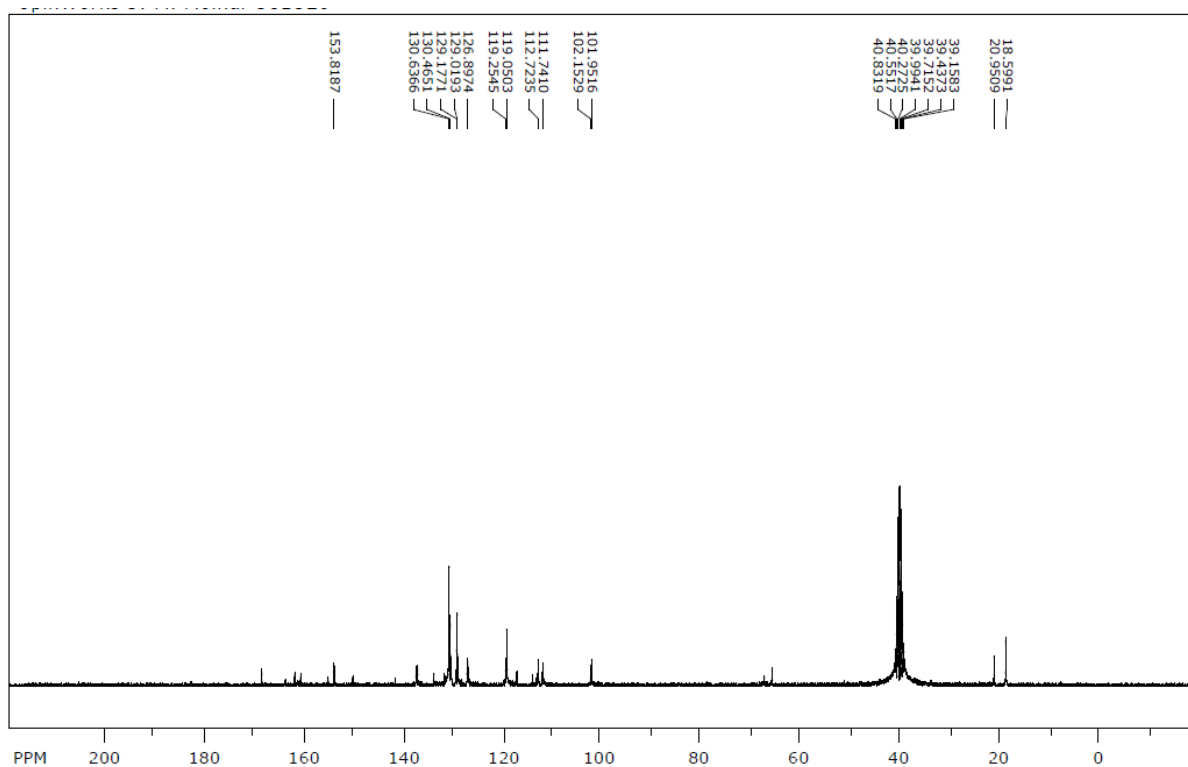



(E)-N'-((1-(4-chlorophenyl)-3-(4-nitrophenyl)-1H-pyrazol-4-yl)methylene)-2-((4-methyl-2-oxo-2H-chromen-7-yl)oxy)acetohydrazide (**35**)

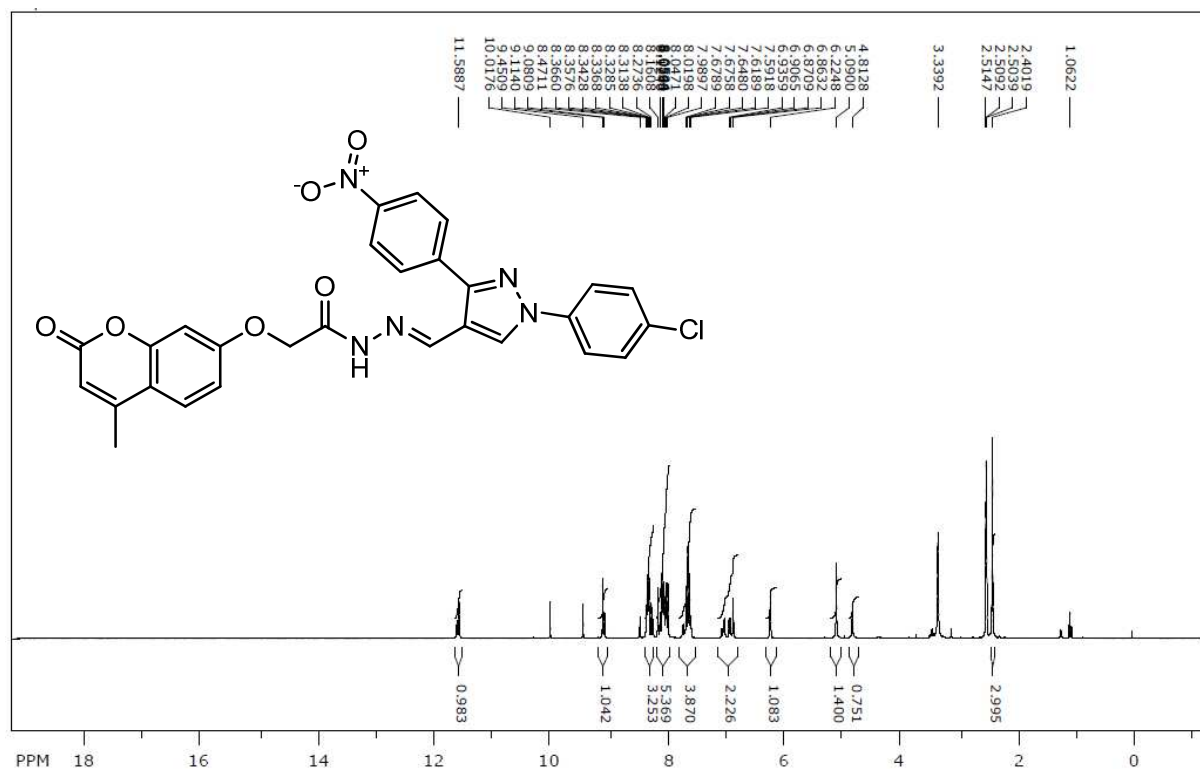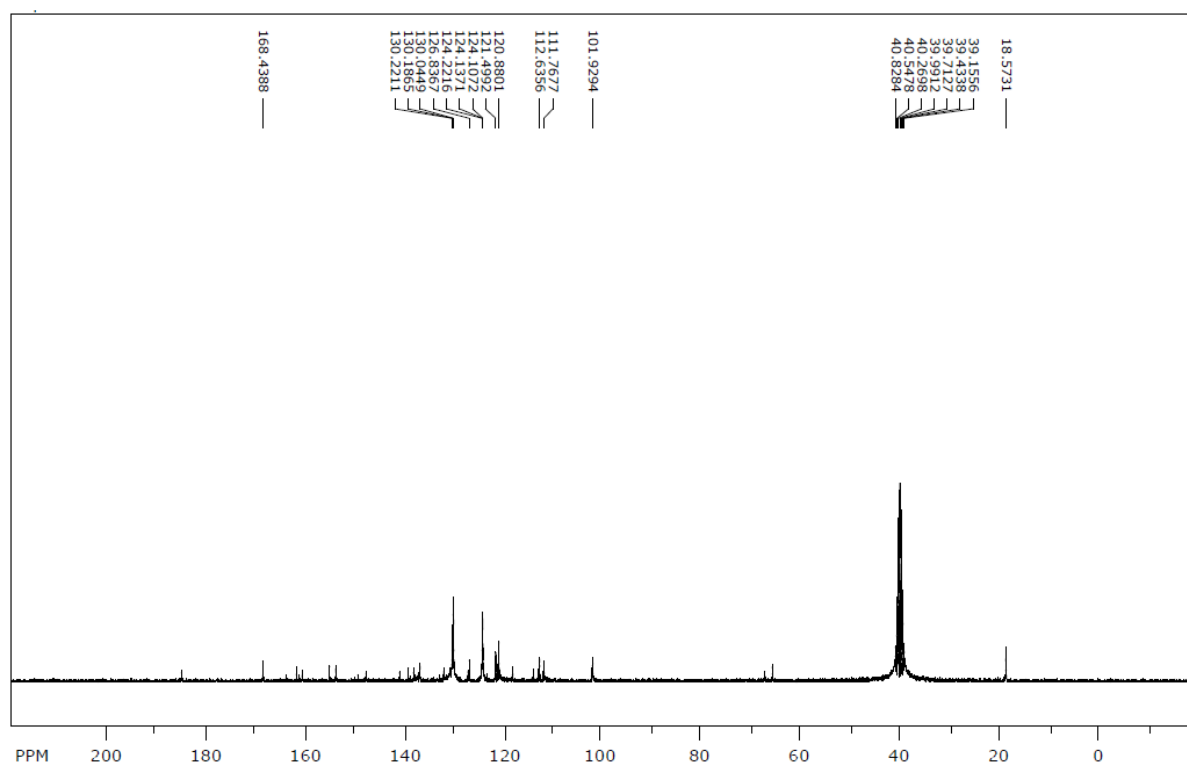

(36)

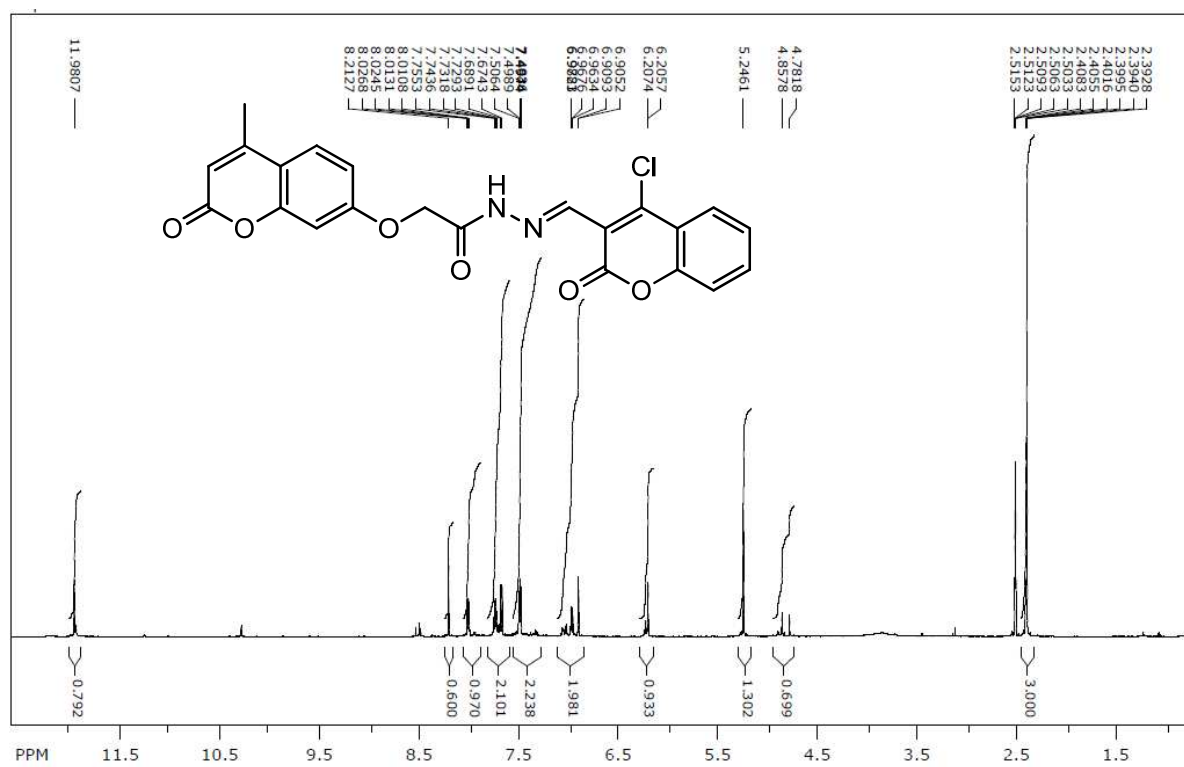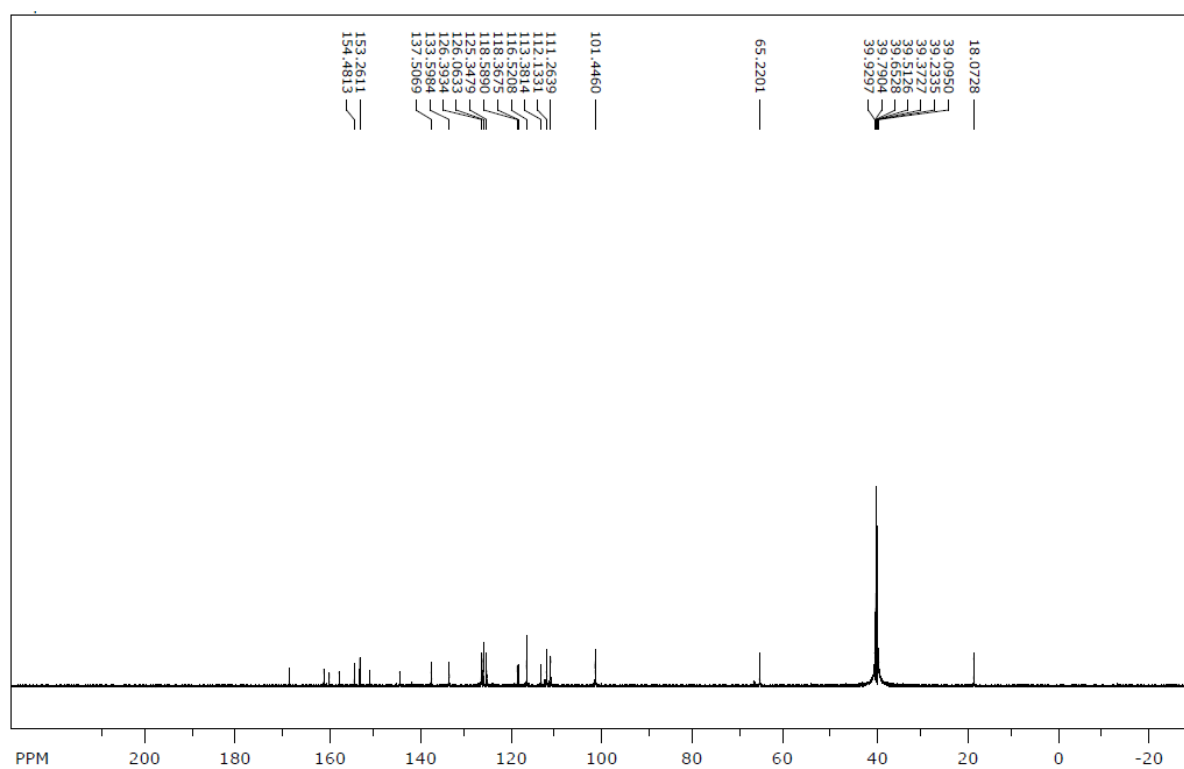

Supplement: s1 [file s1]
