# Supplementary material for: Deep Eutectic Solvents as Convenient Media for Synthesis of Novel Coumarinyl Schiff Bases and Their QSAR Studies
Source: MDPI journal article supplement (doi:10.3390/molecules22091482), 2017-09-05
Supplement: s1 [file s1]

Table S2: Values of the descriptors included in models (1-2), as experimental and calculated log %DPPH.

| Mol. ID | <i>Mor22u</i> | <i>MATS3m</i> | <i>Hy</i> | Status   | Exp. log % DPPH | Calc. log % DPPH by eq. 1 | Calc. log % DPPH by eq. 1 |
|---------|---------------|---------------|-----------|----------|-----------------|---------------------------|---------------------------|
| 1       | 0.252         | -0.214        | -0.790    | Training | 0.255           | 0.417                     | 0.463                     |
| 2       | 0.111         | -0.179        | -0.202    | Training | 0.380           | 0.603                     | 0.645                     |
| 3       | 0.028         | 0.119         | 1.251     | Training | 1.158           | 1.091                     | 1.123                     |
| 4       | 0.285         | 0.123         | -0.317    | Training | 1.360           | 0.888                     | 0.899                     |
| 5       | 0.268         | 0.017         | 0.289     | Training | 1.220           | 1.118                     | 1.122                     |
| 6*      | 0.267         | 0.048         | 0.289     | Test     | 0.556           | 0.988                     | 1.006                     |
| 7       | 0.267         | 0.048         | 0.289     | Training | 0.644           | 0.988                     | 1.006                     |
| 8       | 0.157         | 0.032         | -0.309    | Training | 0.491           | 0.698                     | 0.727                     |
| 9       | -0.041        | 0.062         | -0.309    | Training | -0.699          | 0.274                     |                           |
| 10      | -0.042        | 0.062         | -0.309    | Training | 0.568           | 0.273                     | 0.345                     |
| 11      | 0.300         | 0.044         | 0.981     | Training | 1.877           | 1.817                     | 1.768                     |
| 12*     | 0.216         | -0.034        | 0.981     | Test     | 0.924           | 1.198                     | 1.213                     |
| 13      | 0.319         | -0.034        | 0.981     | Training | 1.524           | 1.350                     | 1.350                     |
| 14      | 0.226         | 0.073         | 0.981     | Training | 1.629           | 1.613                     | 1.584                     |
| 15      | 0.146         | -0.007        | 0.981     | Training | 0.663           | 1.000                     | 1.035                     |
| 16      | -0.117        | 0.088         | 0.282     | Training | 1.505           | 0.809                     | 0.840                     |
| 17      | 0.082         | 0.039         | -0.372    | Training | 0.342           | -0.129                    | -0.015                    |
| 18      | -0.119        | -0.084        | 0.330     | Training | 0.462           | 0.920                     | 0.942                     |
| 19*     | -0.274        | 0.125         | -0.297    | Test     | 0.544           | 0.600                     | 0.635                     |
| 20      | 0.055         | -0.091        | -0.294    | Training | 1.045           | 0.636                     | 0.671                     |
| 21      | 0.153         | -0.047        | -0.294    | Training | 0.875           | 0.636                     | 0.672                     |
| 22      | 0.015         | -0.064        | -0.294    | Training | 0.820           | 0.575                     | 0.616                     |
| 23      | 0.202         | -0.031        | -0.294    | Training | 0.477           | 0.807                     | 0.826                     |
| 24*     | 0.217         | -0.031        | -0.294    | Test     | 0.699           | 0.829                     | 0.846                     |
| 25      | 0.326         | -0.051        | -0.294    | Training | 0.477           | 0.922                     | 0.930                     |
| 26      | 0.171         | -0.006        | -0.294    | Training | 0.362           | 0.477                     | 0.530                     |
| 27      | 0.226         | -0.006        | -0.294    | Training | 0.869           | 0.558                     | 0.603                     |
| 28*     | 0.170         | 0.157         | -0.346    | Test     | 0.204           | 0.605                     | 0.643                     |

|            |        |        |        |          |        |        |        |
|------------|--------|--------|--------|----------|--------|--------|--------|
| <b>29</b>  | -0.171 | 0.118  | -0.323 | Training | 0.771  | 0.615  | 0.649  |
| <b>30</b>  | -0.139 | -0.043 | -0.348 | Training | 0.204  | 0.134  | 0.218  |
| <b>31</b>  | -0.346 | -0.019 | -0.374 | Training | -0.301 | -0.006 | 0.089  |
| <b>32</b>  | -0.277 | -0.015 | -0.374 | Training | 0.204  | 0.110  | 0.194  |
| <b>33*</b> | -0.187 | 0.038  | -0.383 | Test     | -0.097 | 0.169  | 0.248  |
| <b>34*</b> | -0.427 | -0.030 | -0.374 | Test     | 0.146  | -0.191 | -0.077 |
| <b>35</b>  | -0.148 | -0.044 | -0.317 | Training | 0.204  | 0.237  | 0.311  |
| <b>36</b>  | 0.302  | -0.131 | -0.297 | Training | 1.149  | 1.106  | 1.094  |

---

\* members of the test set
